# Supplementary material for: Cost-effectiveness analysis of 21-valent pneumococcal conjugated vaccine among adults in Canada
Source: bioRxiv or medRxiv preprint supplement (doi:10.1101/2024.10.21.24315770), 2024-10-22
Supplement: Supplementary file [file media-1.pdf]

# Supplementary files - Cost-effectiveness analysis of 21-valent pneumococcal conjugated vaccine among adults in Canada

Raphael Ximenes, PhD<sup>1</sup>, Alison E. Simmons, MPH<sup>1,2</sup>, Gebremedhin B. Gebretekle, PhD<sup>1</sup>, Austin Nam, PhD<sup>1</sup>, Eva Wong<sup>1</sup>, Marina I. Salvadori<sup>1,3</sup>, Alyssa R. Golden, PhD<sup>4</sup>, Beate Sander, PhD<sup>5,6,7,8</sup>, Kyla J. Hildebrand<sup>9, 10</sup>, Matthew Tunis, PhD<sup>1</sup>, and Ashleigh R. Tuite, PhD MPH<sup>1,2</sup>

<sup>1</sup> Centre for Immunization Surveillance and Programs, Public Health Agency of Canada, Ottawa, ON, Canada

<sup>2</sup> Dalla Lana School of Public Health, University of Toronto, Toronto, ON, Canada

<sup>3</sup> Department of Pediatrics, McGill University, Montreal, QC, Canada

<sup>4</sup> National Microbiology Laboratory Branch, Public Health Agency of Canada, Winnipeg, MB, Canada

<sup>5</sup> University Health Network, Toronto, ON, Canada

<sup>6</sup> Institute of Health Policy, Management and Evaluation (IHPE), University of Toronto, Toronto, ON, Canada

<sup>7</sup> Public Health Ontario, Toronto, ON, Canada

<sup>8</sup> ICES, Toronto, ON, Canada

<sup>9</sup> Department of Pediatrics, Division of Immunology, Faculty of Medicine, University of British Columbia, Vancouver, BC, Canada

<sup>10</sup> British Columbia Children's Hospital Research Institute, Vancouver, BC, Canada

**Corresponding author email:** [raphael.ximenes@phac-aspc.gc.ca](mailto:raphael.ximenes@phac-aspc.gc.ca)

**Funding statement:**

This research was supported, in part, by a Canada Research Chair in Economics of Infectious Diseases held by Beate Sander (CRC-2022-00362).

**Keywords:** Pneumococcal, Invasive pneumococcal disease; Vaccines, PCV20, PCV21, Cost-effectiveness, High risk populations, health economic modeling

## Appendix A. Supplementary Material

**Supplementary Methods:** Age- and region-specific incidence data for IPD were obtained from the International Circumpolar Surveillance program and the Canadian Notifiable Disease Surveillance System (1, 2). The model accounts for regional variations, such as significantly higher incidence of IPD and CAP in Northern Canada compared to the rest of the country. The serotype distribution by age group was obtained from The Public Health Agency of Canada's National Microbiology Laboratory [PHAC-NML] (3). Serotypes were then categorized into distinct groups based on vaccine coverage. We classified serotypes covered by multiple vaccines and identified those unique to specific vaccines.

Data on age-specific inpatient CAP incidence were obtained from the Discharge Abstract Database (DAD) (4). The relative risk of PD in higher-risk populations (5-8), as well as estimates of case fatality (9, 10) and the risk of long term-sequelae (11-13) were obtained from the literature. Duration of vaccine protection was accounted for with a 15-year time horizon for the conjugate vaccine, assuming stable effectiveness for the first 5 years, followed by a linear decline in effectiveness, reaching zero by the end of the 15-year period. (11-13).

The costs associated with IPD and pneumonia-related hospitalizations were estimated using Resource Intensity Weights obtained from the Discharge Abstract Database (4). Hospitalization costs for IPD and CAP were adjusted for different age groups and regions, taking into account the higher healthcare costs in Northern Canada (14-18). The model also considered non-medical costs, such as transportation, which can be substantial in remote areas (4, 19-27). Additionally, indirect costs, such as lost productivity and caregiver burden (28-30), were included in the economic analysis for the societal perspective.

**Table S1. Epidemiologic parameters**

| Parameter                                                                         | Base     | Range               | Reference                                                                                                                   |                   |
|-----------------------------------------------------------------------------------|----------|---------------------|-----------------------------------------------------------------------------------------------------------------------------|-------------------|
| <b>IPD incidence (per 100,000)</b>                                                |          |                     |                                                                                                                             |                   |
| <b>18-49 years</b>                                                                |          |                     |                                                                                                                             |                   |
| Northern Canada <sup>a</sup>                                                      | 11.2     | 8.4 – 14.0*         | Canadian Notifiable Disease System (CNDSS) 2018-2019; International Circumpolar Surveillance (ICS) program 2018-2019 (1, 2) |                   |
| Rest of Canada                                                                    | 5.2      | 3.9 – 6.5*          |                                                                                                                             |                   |
| <b>50-64 years</b>                                                                |          |                     |                                                                                                                             |                   |
| Northern Canada                                                                   | 38.97    | 23.10 – 58.93       |                                                                                                                             |                   |
| Rest of Canada                                                                    | 14.45    | 13.83 – 15.09       |                                                                                                                             |                   |
| <b>65-74 years</b>                                                                |          |                     |                                                                                                                             |                   |
| Northern Canada                                                                   | 71.30    | 34.20 – 121.79      |                                                                                                                             |                   |
| Rest of Canada                                                                    | 20.61    | 19.52 – 21.72       |                                                                                                                             |                   |
| <b>75+ years</b>                                                                  |          |                     |                                                                                                                             |                   |
| Northern Canada                                                                   | 105.01   | 38.55 – 204.12      |                                                                                                                             |                   |
| Rest of Canada                                                                    | 31.06    | 29.51 – 32.65       |                                                                                                                             |                   |
| <b>Inpatient CAP incidence (per 100,000)</b>                                      |          |                     |                                                                                                                             |                   |
| <b>18-49 years</b>                                                                |          |                     |                                                                                                                             |                   |
| Northern Canada                                                                   | 167.37   | 143.86 – 190.88     |                                                                                                                             | DAD 2018-2019 (4) |
| Rest of Canada                                                                    | 90.60    | 89.42 – 91.78       |                                                                                                                             |                   |
| <b>50-64 years</b>                                                                |          |                     |                                                                                                                             |                   |
| Northern Canada                                                                   | 568.81   | 500.44 – 637.18     |                                                                                                                             |                   |
| Rest of Canada                                                                    | 347.81   | 344.45 – 351.16     |                                                                                                                             |                   |
| <b>65-74 years</b>                                                                |          |                     |                                                                                                                             |                   |
| Northern Canada                                                                   | 1,777.32 | 1,562.12 – 1,992.51 |                                                                                                                             |                   |
| Rest of Canada                                                                    | 871.48   | 863.79 – 879.18     |                                                                                                                             |                   |
| <b>75+ years</b>                                                                  |          |                     |                                                                                                                             |                   |
| Northern Canada                                                                   | 5,104.13 | 4,540.99 – 5,667.28 |                                                                                                                             |                   |
| Rest of Canada                                                                    | 2,845.89 | 2,829.82 – 2,861.95 |                                                                                                                             |                   |
| <b>Relative risk of PD in higher risk populations</b>                             |          |                     |                                                                                                                             |                   |
| Experiencing homelessness                                                         | 50       | 27 – 72             | Tyrell et al., 2021; Plevnesi et al., 2009; Shariatzadeh et al., 2005; Steinberg et al., 2023 (31-34)                       |                   |
| <b>18-64 years</b>                                                                |          |                     |                                                                                                                             |                   |
| Chronic medical condition                                                         | 4        | 3 – 6               | Shigayeva et al., 2022 (5)                                                                                                  |                   |
| Immunocompromising condition                                                      | 34       | 21 – 55             |                                                                                                                             |                   |
| <b>65+ years</b>                                                                  |          |                     |                                                                                                                             |                   |
| Chronic medical condition                                                         | 1.7      | 1.0 – 2.5           | Shigayeva et al., 2022 (5)                                                                                                  |                   |
| Immunocompromising condition                                                      | 4.3      | 2.5 – 7.4           |                                                                                                                             |                   |
| <b>Proportion of CAP cases managed in inpatient setting (%)<sup>c</sup></b>       |          |                     |                                                                                                                             |                   |
| 18-49 years                                                                       | 3.27     | 0.69 – 5.86         | O'Reilly et al., 2023 (14)                                                                                                  |                   |
| 50-64 years                                                                       | 15.10    | 12.80 – 17.40       |                                                                                                                             |                   |
| 65-74 years                                                                       | 24.76    | 22.66 – 26.85       |                                                                                                                             |                   |
| 75+ years                                                                         | 32.65    | 30.53 – 34.76       |                                                                                                                             |                   |
| <b>Proportion of CAP cases attributed to <i>S. pneumoniae</i> (%)<sup>d</sup></b> |          |                     |                                                                                                                             |                   |
| 18-49 years                                                                       | 19.5     | 14.6 – 24.4*        | LeBlanc et al., 2022 (6)                                                                                                    |                   |
| 50+ years                                                                         | 18.0     | 8.0 – 24.0          | Lansbury et al., 2022; LeBlanc et al., 2022 (6, 35)                                                                         |                   |
| <b>Proportion of IPD cases with meningitis (%)</b>                                |          |                     |                                                                                                                             |                   |

|                                                                                            |      |             |                            |
|--------------------------------------------------------------------------------------------|------|-------------|----------------------------|
| 18-64 years                                                                                | 7.0  | 5.3 – 8.8*  | Backhaus et al., 2016 (9)  |
| 65+ years                                                                                  | 5.0  | 3.8 – 6.3*  |                            |
| <b>Proportion of IPD cases with meningitis who experience post-meningitis sequelae (%)</b> |      |             |                            |
| Neurologic sequelae <sup>e</sup>                                                           | 12.2 | 5.3 – 19.1  | Jit, 2010 (10)             |
| Auditory sequelae <sup>f</sup>                                                             | 20.9 | 17.1 – 24.7 |                            |
| <b>Case fatality (%)</b>                                                                   |      |             |                            |
| <b>IPD</b>                                                                                 |      |             |                            |
| 18-49 years                                                                                | 5.7  | 4.9 – 6.6   | Wijayasri et al., 2019 (7) |
| 50-64 years                                                                                | 10.9 | 9.9 – 12.0  |                            |
| 65+ years                                                                                  | 17.2 | 16.2 – 18.3 |                            |
| <b>Inpatient pCAP</b>                                                                      |      |             |                            |
| 16-49 years                                                                                | 3.8  | 1.4 – 6.2   | LeBlanc et al., 2022 (6)   |
| 50-64 years                                                                                | 4.8  | 2.7 – 6.9   |                            |
| 65+ years                                                                                  | 9.9  | 7.5 – 12.2  |                            |
| <b>Relative risk of death from PD in higher risk population</b>                            |      |             |                            |
| Chronic medical condition                                                                  | 1.5  |             | Shigayeva et al., 2022 (5) |
| Immunocompromising condition                                                               | 1.9  |             | Shigayeva et al., 2016 (8) |

Notes: IPD = invasive pneumococcal disease; CAP = community acquired pneumonia.

<sup>a</sup> Values for Northern Canada were calculated by adjusting estimates for the Rest of Canada with multipliers (i.e., 2.15) extracted from the Canadian Notifiable Disease System (CNDSS) 2018-2019 and International Circumpolar Surveillance (ICS) program 2018-2019 (1, 2)

<sup>b</sup> Parameters were derived using polynomial regression.

<sup>d</sup> Proportion of CAP cases among hospitalized adults where *S. pneumoniae* was detected from blood culture, sputum culture, or urine antigen detection

<sup>e</sup> Cranial nerve palsies

<sup>f</sup> Hearing loss

\* Range defined as  $\pm 25\%$  of the base value

**Table S2. Vaccine parameters**

| Parameter                                                                        | Base                                                            | Range       | Reference                                                                    |
|----------------------------------------------------------------------------------|-----------------------------------------------------------------|-------------|------------------------------------------------------------------------------|
| <b>Vaccination coverage (%)</b>                                                  |                                                                 |             |                                                                              |
| 18-49 years                                                                      | 21.2                                                            | 19.1 – 23.5 | Government of Canada, 2024 (36)                                              |
| 50-64 years                                                                      | 28.8                                                            | 26.5 – 31.1 |                                                                              |
| 65-79 years                                                                      | 54.0                                                            | 51.9 – 56.0 |                                                                              |
| <b>With chronic medical conditions (including immunocompromising conditions)</b> |                                                                 |             |                                                                              |
| 18-49 years                                                                      | 24.3                                                            | 21.6 – 27.3 | Government of Canada, 2024 (36)                                              |
| 50-64 years                                                                      | 33.4                                                            | 30.8 – 36.2 |                                                                              |
| 65-79 years                                                                      | 60.7                                                            | 57.7 – 63.7 |                                                                              |
| 80+ years                                                                        | 65.6                                                            | 56.1 – 74.0 |                                                                              |
| <b>Vaccine effectiveness</b>                                                     |                                                                 |             |                                                                              |
| <b>Pneu-C at age 65 (%)</b>                                                      |                                                                 |             |                                                                              |
| VT-IPD                                                                           | 88                                                              | 61 – 98     | van Werkhoven et al., 2015 (12)                                              |
| ST3-IPD                                                                          | 53                                                              | 0 – 80      | Lewis et al., 2019; Farrar et al., 2023 (37, 38)                             |
| VT-pCAP                                                                          | 68                                                              | 39 – 85     | van Werkhoven et al., 2015 (12)                                              |
| ST3-pCAP                                                                         | 16                                                              | 0 – 32      | Stoecker, 2024 (39)                                                          |
| <b>Pneu-P at age 65 (%)</b>                                                      |                                                                 |             |                                                                              |
| VT-IPD                                                                           | 52                                                              | 36 – 64     | Farrar et al., 2023 (37)                                                     |
| ST3-IPD                                                                          | 2                                                               | 0 – 21      | Djennad et al., 2018 (40)                                                    |
| VT-pCAP                                                                          | 26                                                              | 0 – 49      | Farrar et al., 2023 (37)                                                     |
| ST3-pCAP                                                                         | 2                                                               | 0 – 21      | Assumption                                                                   |
| <b>Pneu-C in adults with chronic medical conditions (%)</b>                      |                                                                 |             |                                                                              |
| VT-IPD                                                                           | 75                                                              | 41 – 98     | Bonten et al., 2014; van Werkhoven et al., 2015; Stoecker, 2024 (12, 41, 42) |
| ST3-IPD                                                                          | 26                                                              | 0 – 53      | Stoecker, 2024 (39)                                                          |
| VT-pCAP                                                                          | 40                                                              | 11 – 60     | Suaya et al., 2018 (43)                                                      |
| ST3-pCAP                                                                         | 16                                                              | 0 – 32      | Stoecker, 2024 (39)                                                          |
| <b>Pneu-C in adults with immunocompromising conditions (%)</b>                   |                                                                 |             |                                                                              |
| VT-IPD                                                                           | 67                                                              | 0 – 99      | Bonten et al., 2014 (41)                                                     |
| ST3-IPD                                                                          | 9                                                               | 0 – 18      | Stoecker, 2024 (39)                                                          |
| VT-pCAP                                                                          | 15                                                              | 5 – 22      | Stoecker, 2024 (39)                                                          |
| ST3-pCAP                                                                         | 5                                                               | 0 – 11      | Stoecker, 2024 (39)                                                          |
| <b>Duration of protection</b>                                                    |                                                                 |             |                                                                              |
| Pneu-C                                                                           | 15 years: stable for 5 years, linear decline to 0 over 10 years |             | Leidner, 2021; Patterson et al., 2016; van Werkhoven et al., 2015 (11-13)    |
| Pneu-P                                                                           | 15 years: linear decline to 0 over 15 years                     |             | Leidner, 2021 (11)                                                           |

Notes: Pneu-C = pneumococcal conjugate vaccine; Pneu-P = pneumococcal polysaccharide vaccine; VT = vaccine-type serotypes; ST3 = serotype 3.

**Table S3.** Direct and indirect cost parameters

| Parameter                                                                    | Base   | Range           | Reference                                                                                                                                        |  |
|------------------------------------------------------------------------------|--------|-----------------|--------------------------------------------------------------------------------------------------------------------------------------------------|--|
| <b>Cost per dose of vaccine (\$)</b>                                         |        |                 |                                                                                                                                                  |  |
| Vaccine administration                                                       | 18     | 13 – 22         | O’Reilly et al., 2017 (44)                                                                                                                       |  |
| PCV-20                                                                       | 109.91 |                 | Pfizer (45)                                                                                                                                      |  |
| PCV-21                                                                       | 129.90 |                 | Merck (46)                                                                                                                                       |  |
| PPV-23                                                                       | 35.24  |                 | Merck (46)                                                                                                                                       |  |
| <b>Cost per inpatient IPD case (\$)</b>                                      |        |                 |                                                                                                                                                  |  |
| 18-49 years                                                                  | 30,440 | 28,059 – 32,915 | DAD 2015-2019 (15-18)                                                                                                                            |  |
| 50-64 years                                                                  | 30,793 | 28,909 – 32,735 |                                                                                                                                                  |  |
| 65-74 years                                                                  | 30,590 | 28,237 – 33,038 |                                                                                                                                                  |  |
| 75+ years                                                                    | 22,716 | 21,131 – 24,357 |                                                                                                                                                  |  |
| <b>Cost per inpatient CAP case (\$)</b>                                      |        |                 |                                                                                                                                                  |  |
| <b>18-64 years</b>                                                           |        |                 |                                                                                                                                                  |  |
| Northern Canada <sup>a</sup>                                                 | 17,906 | 17,305 – 18,538 | O’Reilly et al., 2023 (14)                                                                                                                       |  |
| Rest of Canada                                                               | 14,986 | 14,483 – 15,515 |                                                                                                                                                  |  |
| <b>65+ years</b>                                                             |        |                 |                                                                                                                                                  |  |
| Northern Canada <sup>a</sup>                                                 | 15,436 | 15,167 – 15,713 |                                                                                                                                                  |  |
| Rest of Canada                                                               | 14,980 | 14,718 – 15,248 |                                                                                                                                                  |  |
| <b>Cost per outpatient CAP case (\$)</b>                                     |        |                 |                                                                                                                                                  |  |
| 18-64 years                                                                  | 1,255  | 1,219 – 1,290   | O’Reilly et al., 2023 (14)                                                                                                                       |  |
| 65+ years                                                                    | 3,531  | 3,469 – 3,592   |                                                                                                                                                  |  |
| <b>Cost of care for patients with post-meningitis sequelae per year (\$)</b> |        |                 |                                                                                                                                                  |  |
| Annual cost of care for those with auditory sequelae <sup>b</sup>            | 3,183  | 2,387 – 3,979*  | Christensen et al., 2014 (47)                                                                                                                    |  |
| Annual cost of care for those with neurologic sequelae <sup>c</sup>          | 10,593 | 7,945 – 13,241* |                                                                                                                                                  |  |
| <b>Cost of medication, out-of-pocket (\$)</b>                                |        |                 |                                                                                                                                                  |  |
| 18-64 years                                                                  | 19.08  | 14.32 – 28.86   | Ontario Drug Benefit (48)                                                                                                                        |  |
| 65+ years                                                                    | 0      |                 |                                                                                                                                                  |  |
| <b>Cost of transportation, health system (\$)</b>                            |        |                 |                                                                                                                                                  |  |
| <b>Inpatient</b>                                                             |        |                 |                                                                                                                                                  |  |
| Northern Canada                                                              | 8,001  | 3,171 – 12,887  | DAD 2018-2019; Glauser et al., 2015; Government of Northwest Territories 2018; Government of Nunavut; Rendell, 2016; Tam et al., 2009 (4, 19-23) |  |
| Rest of Canada                                                               | 418    | 210 – 626       | DAD 2018-2019; Glauser et al., 2015; Government of Nunavut; Rendell, 2016 (4, 19, 21, 22)                                                        |  |
| <b>Outpatient</b>                                                            |        |                 |                                                                                                                                                  |  |
| Northern Canada                                                              | 129    | 97 – 161        | Government of Yukon; Pong and Pitblado, 2005 (24, 25)                                                                                            |  |
| Rest of Canada                                                               | 0      |                 | Assumed to be out-of-pocket                                                                                                                      |  |
| <b>Cost of transportation, out-of-pocket (\$)</b>                            |        |                 |                                                                                                                                                  |  |
| <b>Inpatient</b>                                                             |        |                 |                                                                                                                                                  |  |
| Northern Canada                                                              | 153    | 75 – 405        | DAD 2018-2019; Glauser et al., 2015; Government of Nunavut; Rendell, 2016 (4, 19, 21, 22)                                                        |  |

|                                                                            |        |                |                                                                                      |
|----------------------------------------------------------------------------|--------|----------------|--------------------------------------------------------------------------------------|
| Rest of Canada                                                             | 89     | 53 – 128       | DAD 2018-2019; CRA 2022; Colbert 2020 (4, 26, 27)                                    |
| <b>Outpatient</b>                                                          |        |                |                                                                                      |
| Northern Canada                                                            | 149    | 112 – 186*     | Government of Yukon; Pong and Pitblado, 2005; CRA 2022 (24-26)                       |
| Rest of Canada                                                             | 4      | 3 – 5*         | Pong and Pitblado, 2005; CRA 2022 (25, 26)                                           |
| Parking                                                                    | 16     | 0 – 32         | Assumption                                                                           |
| <b>Daily cost of travel subsidy for overnight stay, health system (\$)</b> |        |                |                                                                                      |
| Northern Canada                                                            | 164    | 82 – 327       | Government of Yukon (24)                                                             |
| Rest of Canada                                                             | 0      |                |                                                                                      |
| <b>Mean annual income (\$)</b>                                             |        |                |                                                                                      |
| 18-49 years <sup>d</sup>                                                   | 57,423 |                | Statistics Canada (49)                                                               |
| 50-64 years <sup>e</sup>                                                   | 80,810 |                |                                                                                      |
| 65+ years                                                                  | 50,741 |                |                                                                                      |
| <b>Mean hourly caregiver income (\$)</b>                                   |        |                |                                                                                      |
| All ages                                                                   | 28.67  | 24.64 – 37.89  | Hollander et al., 2009 (28)                                                          |
| <b>Work time lost (days)</b>                                               |        |                |                                                                                      |
| Inpatient IPD or CAP                                                       | 14.6   | 8.8 – 28.2     | Pasquale et al. 2019 (50)                                                            |
| Outpatient CAP                                                             | 5.4    | 1.8 – 6.3      |                                                                                      |
| Visit health care provider for vaccination                                 | 0.5    |                | Assumption                                                                           |
| <b>Reduction in employment due to post-meningitis sequelae (%)</b>         |        |                |                                                                                      |
| Auditory sequelae                                                          | 25     | 15 – 35        | Assumption used for lower estimate; Bizier et al., 2016; Jiang et al., 2012 (51, 52) |
| Neurologic sequelae                                                        | 98     | 75 – 100       | Assumption; Jiang et al., 2012 (52)                                                  |
| <b>Caregiver time lost (hours)</b>                                         |        |                |                                                                                      |
| Inpatient IPD or CAP                                                       | 40.65  | 11.63 – 81.30  | Wyrwich et al., 2015 (29)                                                            |
| Neurologic sequelae                                                        | 5,660  | 4,245 – 7,075* | Ganapathy et al., 2015 (30)                                                          |

Notes: Costs were converted to Canadian dollars using purchasing power parities from the Organisation for Economic Co-operation and Development and inflated to 2023 dollars using the Canadian Consumer Price Index. Product-specific values were used for health-related costs and transportation costs.

<sup>a</sup> Values for Northern Canada were calculated by adjusting estimates for the Rest of Canada with multipliers extracted from the Discharge Abstract Database 2015-2019 (15-18)

<sup>b</sup> The annual cost for auditory sequelae reflects the annual cost The shifting epidemiology and serotype distribution of invasive pneumococcal disease in Ontario, Canada, 2007-2017 of minor post-meningitis sequelae.

<sup>c</sup> The annual cost of neurologic sequelae reflects the annual cost of severe post-meningitis sequelae.

<sup>d</sup> Median total income in 2022 CAD, inflated to 2023 CAD, for 25 to 34 years of age

<sup>e</sup> Median total income in 2022 CAD, inflated to 2023 CAD, for 45 to 54 years of age

\* Range defined as  $\pm 25\%$  of the base value

**Table S4. Health utilities**

| Parameter                                                    | Base   | Range           | Reference                                           |
|--------------------------------------------------------------|--------|-----------------|-----------------------------------------------------|
| <b>Background health utility</b>                             |        |                 |                                                     |
| 18-49 years                                                  | 0.873  | 0.857 – 0.89    | Yan et al., 2023 (53)                               |
| 50-64 years                                                  | 0.847  | 0.83 – 0.864    |                                                     |
| 65-74 years                                                  | 0.867  | 0.849 – 0.885   |                                                     |
| 75+ years                                                    | 0.861  | 0.835 – 0.887   |                                                     |
| <b>Average background health utility</b>                     |        |                 |                                                     |
| Chronic medical or immunocompromising condition <sup>a</sup> | 0.836  |                 |                                                     |
| No chronic medical or immunocompromising condition           | 0.899  |                 |                                                     |
| <b>IPD and pCAP utility multipliers</b>                      |        |                 |                                                     |
| Hospitalization                                              | 0.8659 | 0.8323 – 0.8963 | Mangen et al., 2017 (54)                            |
| Outpatient CAP                                               | 0.9938 | 0.9917 – 0.9956 | Oppong et al., 2013a; Oppong et al., 2013b (55, 56) |
| Auditory Sequelae                                            | 0.6850 | 0.6214 – 0.7451 | Galante et al., 2011 (57)                           |
| Neurologic Sequelae                                          | 0.3441 | 0.2725 – 0.4164 | Galante et al., 2011 (57)                           |

<sup>a</sup> We assumed this background health utility also applies to individuals experiencing homelessness



**Table S1.** Mean Costs, QALYs, and ICERs for pneumococcal vaccination of adults aged 65 years and older at average risk of IPD, from health system and societal perspectives (per 100,000 population)

| Serotype distribution data year  | Indirect effects assumption | Rest of Canada |             |           |                 | Northern Canada |             |           |                 |
|----------------------------------|-----------------------------|----------------|-------------|-----------|-----------------|-----------------|-------------|-----------|-----------------|
|                                  |                             | Strategies     | Costs (\$)  | QALYs     | Sequential ICER | Strategies      | Costs (\$)  | QALYs     | Sequential ICER |
| <b>Health system perspective</b> |                             |                |             |           |                 |                 |             |           |                 |
| 2022                             | No indirect Effects         | PCV21          | 127,406,265 | 1,378,631 | ---             | PCV21           | 260,578,720 | 1,173,753 | ---             |
|                                  |                             | PCV20          | 129,647,781 | 1,378,472 | Dominated       | PCV20           | 268,584,936 | 1,173,461 | Dominated       |
|                                  | Indirect Effects from PCV15 | PCV21          | 127,564,622 | 1,378,624 | ---             | PCV21           | 260,999,450 | 1,173,741 | ---             |
|                                  |                             | PCV20          | 130,121,939 | 1,378,451 | Dominated       | PCV20           | 269,842,046 | 1,173,423 | Dominated       |
|                                  | Indirect Effects from PCV20 | PCV21          | 127,821,235 | 1,378,613 | ---             | PCV21           | 261,681,134 | 1,173,720 | ---             |
|                                  |                             | PCV20          | 130,890,091 | 1,378,416 | Dominated       | PCV20           | 271,877,732 | 1,173,362 | Dominated       |
| 2015-2019                        | No indirect Effects         | PCV21          | 126,356,529 | 1,378,682 | ---             | PCV21           | 257,733,767 | 1,173,844 | ---             |
|                                  |                             | PCV20          | 129,975,821 | 1,378,456 | Dominated       | PCV20           | 269,522,644 | 1,173,430 | Dominated       |
|                                  | Indirect Effects from PCV15 | PCV21          | 126,536,703 | 1,378,673 | ---             | PCV21           | 258,212,761 | 1,173,829 | ---             |
|                                  |                             | PCV20          | 130,514,889 | 1,378,432 | Dominated       | PCV20           | 270,951,520 | 1,173,387 | Dominated       |
|                                  | Indirect Effects from PCV20 | PCV21          | 126,808,856 | 1,378,661 | ---             | PCV21           | 258,936,168 | 1,173,808 | ---             |
|                                  |                             | PCV20          | 131,328,910 | 1,378,395 | Dominated       | PCV20           | 273,108,195 | 1,173,322 | Dominated       |
| <b>Societal perspective</b>      |                             |                |             |           |                 |                 |             |           |                 |
| 2022                             | No indirect Effects         | PCV21          | 164,786,256 | 1,378,631 | ---             | PCV21           | 321,415,627 | 1,173,753 | ---             |
|                                  |                             | PCV20          | 168,082,639 | 1,378,472 | Dominated       | PCV20           | 331,911,406 | 1,173,461 | Dominated       |
|                                  | Indirect Effects from PCV15 | PCV21          | 164,993,185 | 1,378,624 | ---             | PCV21           | 321,946,568 | 1,173,741 | ---             |
|                                  |                             | PCV20          | 168,702,229 | 1,378,451 | Dominated       | PCV20           | 333,497,831 | 1,173,423 | Dominated       |
|                                  | Indirect Effects from PCV20 | PCV21          | 165,328,503 | 1,378,613 | ---             | PCV21           | 322,806,819 | 1,173,720 | ---             |
|                                  |                             | PCV20          | 169,705,986 | 1,378,416 | Dominated       | PCV20           | 336,066,804 | 1,173,362 | Dominated       |
| 2015-2019                        | No indirect Effects         | PCV21          | 163,414,965 | 1,378,682 | ---             | PCV21           | 317,823,008 | 1,173,844 | ---             |
|                                  |                             | PCV20          | 168,528,715 | 1,378,456 | Dominated       | PCV20           | 333,139,604 | 1,173,430 | Dominated       |
|                                  | Indirect Effects from PCV15 | PCV21          | 163,650,399 | 1,378,673 | ---             | PCV21           | 318,427,470 | 1,173,829 | ---             |
|                                  |                             | PCV20          | 169,233,122 | 1,378,432 | Dominated       | PCV20           | 334,942,787 | 1,173,387 | Dominated       |
|                                  | Indirect Effects from PCV20 | PCV21          | 164,006,022 | 1,378,661 | ---             | PCV21           | 319,340,367 | 1,173,808 | ---             |
|                                  |                             | PCV20          | 170,296,818 | 1,378,395 | Dominated       | PCV20           | 337,664,437 | 1,173,322 | Dominated       |

**Table S2.** Mean Costs, QALYs, and ICERs for pneumococcal vaccination of adults aged 50 years at average risk of IPD, from health system and societal perspectives (per 100,000 population)

| Serotype distribution data year  | Indirect effects assumption | Rest of Canada      |             |             |                    | Northern Canada    |             |             |                    |                    |
|----------------------------------|-----------------------------|---------------------|-------------|-------------|--------------------|--------------------|-------------|-------------|--------------------|--------------------|
|                                  |                             | Strategies          | Costs (\$)  | QALYs       | Sequential ICER    | Strategies         | Costs (\$)  | QALYs       | Sequential ICER    |                    |
| <b>Health system perspective</b> |                             |                     |             |             |                    |                    |             |             |                    |                    |
| 2022                             | No indirect Effects         | No vaccine          | 121,709,132 | 2,099,334   | ---                | PCV20              | 266,005,115 | 1,892,721   | ---                |                    |
|                                  |                             | PCV20               | 123,337,835 | 2,099,437   | 15,840             | PCV21              | 266,563,217 | 1,892,721   | 1,765,679          |                    |
|                                  |                             | PCV21               | 123,901,032 | 2,099,437   | 3,246,243          | No vaccine         | 267,888,430 | 1,892,530   | Dominated by PCV20 |                    |
|                                  | Indirect Effects from PCV15 | No vaccine          | 121,709,132 | 2,099,334   | ---                | PCV20              | 266,138,328 | 1,892,717   | ---                |                    |
|                                  |                             | PCV20               | 123,386,599 | 2,099,434   | 16,704             | PCV21              | 266,607,624 | 1,892,720   | 145,953            |                    |
|                                  |                             | PCV21               | 123,917,288 | 2,099,436   | 299,422            | No vaccine         | 267,888,430 | 1,892,530   | Dominated by PCV20 |                    |
|                                  | Indirect Effects from PCV20 | No vaccine          | 121,709,132 | 2,099,334   | ---                | PCV20              | 266,669,455 | 1,892,699   | ---                |                    |
|                                  |                             | PCV20               | 123,581,051 | 2,099,425   | 20,604             | PCV21              | 266,784,721 | 1,892,714   | 7,802              |                    |
|                                  |                             | PCV21               | 123,982,116 | 2,099,433   | 49,201             | No vaccine         | 267,888,430 | 1,892,530   | Dominated by PCV20 |                    |
|                                  | 2015-2019                   | No indirect Effects | No vaccine  | 121,709,132 | 2,099,334          | ---                | PCV21       | 265,299,501 | 1,892,764          | ---                |
|                                  |                             |                     | PCV21       | 123,437,274 | 2,099,460          | 13,662             | No Vaccine  | 267,888,430 | 1,892,530          | Dominated by PCV20 |
|                                  |                             |                     | PCV20       | 123,526,358 | 2,099,427          | Dominated by PCV21 | PCV20       | 266,530,502 | 1,892,702          | Dominated by PCV21 |
| Indirect Effects from PCV15      |                             | No vaccine          | 121,709,132 | 2,099,334   | ---                | PCV21              | 265,388,371 | 1,892,761   | ---                |                    |
|                                  |                             | PCV21               | 123,469,789 | 2,099,459   | 14,098             | No Vaccine         | 267,888,430 | 1,892,530   | Dominated by PCV20 |                    |
|                                  |                             | PCV20               | 123,623,802 | 2,099,422   | Dominated by PCV21 | PCV20              | 266,796,638 | 1,892,694   | Dominated by PCV21 |                    |

|                             |                             |            |             |           |                      |            |             |           |                    |
|-----------------------------|-----------------------------|------------|-------------|-----------|----------------------|------------|-------------|-----------|--------------------|
|                             | Indirect Effects from PCV20 | No vaccine | 121,709,132 | 2,099,334 | ---                  | PCV21      | 265,572,690 | 1,892,755 | ---                |
|                             |                             | PCV21      | 123,537,230 | 2,099,455 | 15,037               | No Vaccine | 267,888,430 | 1,892,530 | Dominated by PCV20 |
|                             |                             | PCV20      | 123,825,880 | 2,099,412 | Dominated by PCV21   | PCV20      | 267,348,446 | 1,892,676 | Dominated by PCV21 |
| <b>Societal perspective</b> |                             |            |             |           |                      |            |             |           |                    |
| 2022                        | No indirect Effects         | No vaccine | 161,968,709 | 2,099,334 | ---                  | No vaccine | 343,080,452 | 1,892,530 | ---                |
|                             |                             | PCV20      | 173,493,328 | 2,099,437 | 112,084              | PCV20      | 349,569,706 | 1,892,721 | 34,016             |
|                             |                             | PCV21      | 174,054,200 | 2,099,437 | 3,250,765            | PCV21      | 350,122,989 | 1,892,721 | 1,750,430          |
|                             | Indirect Effects from PCV15 | No vaccine | 161,968,703 | 2,099,334 | ---                  | No vaccine | 343,080,452 | 1,892,530 | ---                |
|                             |                             | PCV20      | 173,574,903 | 2,099,434 | 115,575              | PCV20      | 349,770,210 | 1,892,717 | 35,885             |
|                             |                             | PCV21      | 174,081,392 | 2,099,436 | 285,769              | PCV21      | 350,189,827 | 1,892,720 | 130,503            |
|                             | Indirect Effects from PCV20 | No vaccine | 161,968,703 | 2,099,334 |                      | No vaccine | 343,080,452 | 1,892,530 | ---                |
|                             |                             | PCV21      | 174,189,842 | 2,099,433 | 123,442              | PCV21      | 350,456,380 | 1,892,714 | 40,118             |
|                             |                             | PCV20      | 173,900,196 | 2,099,425 | Extendedly dominated | PCV20      | 350,569,624 | 1,892,699 | Dominated by PCV21 |
| 2015-2019                   | No indirect Effects         | No vaccine | 161,968,703 | 2,099,334 | ---                  | No vaccine | 343,080,452 | 1,892,530 | ---                |
|                             |                             | PCV21      | 173,275,973 | 2,099,460 | 89,392               | PCV21      | 348,213,134 | 1,892,764 | 21,971             |
|                             |                             | PCV20      | 173,816,232 | 2,099,427 | Dominated by PCV21   | PCV20      | 350,379,417 | 1,894,702 | Dominated by PCV21 |
|                             | Indirect Effects from PCV15 | No vaccine | 161,968,703 | 2,099,334 | ---                  | No vaccine | 343,080,452 | 1,892,530 | ---                |
|                             |                             | PCV21      | 173,330,365 | 2,099,459 | 90,973               | PCV21      | 348,346,893 | 1,892,761 | 22,827             |
|                             |                             | PCV20      | 173,979,242 | 2,099,422 | Dominated by PCV21   | PCV20      | 350,779,983 | 1,892,694 | Dominated by PCV21 |
|                             | Indirect Effects from PCV20 | No vaccine | 161,968,703 | 2,099,334 | ---                  | No vaccine | 343,080,452 | 1,892,530 | ---                |
|                             |                             | PCV21      | 173,443,184 | 2,099,455 | 94,385               | PCV21      | 348,624,316 | 1,892,755 | 24,673             |
|                             |                             | PCV20      | 174,317,292 | 2,099,412 | Dominated by PCV21   | PCV20      | 351,610,525 | 1,892,676 | Dominated by PCV21 |

**Table S3.** Mean Costs, QALYs, and ICERs for pneumococcal vaccination of adults aged 50 years with immunocompromising conditions (RR = 34), from health system and societal perspectives (per 100,000 population)

| Serotype distribution data year  | Indirect effects assumption | Rest of Canada |               |           |                 |
|----------------------------------|-----------------------------|----------------|---------------|-----------|-----------------|
|                                  |                             | Strategies     | Costs         | QALYs     | Sequential ICER |
| <b>Health system perspective</b> |                             |                |               |           |                 |
| 2022                             | No indirect Effects         | PCV20          | 2,257,012,222 | 1,691,426 |                 |
|                                  |                             | PCV21          | 2,257,633,083 | 1,691,428 | 341,785         |
|                                  | Indirect Effects from PCV15 | PCV20          | 2,257,554,999 | 1,691,400 |                 |
|                                  |                             | PCV21          | 2,257,814,057 | 1,691,419 | 13,149          |
|                                  | Indirect Effects from PCV20 | PCV21          | 2,258,535,466 | 1,691,384 |                 |
|                                  |                             | PCV20          | 2,259,716,210 | 1,691,294 | Dominated       |
| 2015-2019                        | No indirect Effects         | PCV21          | 2,252,167,757 | 1,691,708 |                 |
|                                  |                             | PCV20          | 2,259,024,960 | 1,691,325 | Dominated       |
|                                  | Indirect Effects from PCV15 | PCV21          | 2,252,531,488 | 1,691,690 |                 |
|                                  |                             | PCV20          | 2,260,107,271 | 1,691,272 | Dominated       |
|                                  | Indirect Effects from PCV20 | PCV21          | 2,253,285,471 | 1,691,653 |                 |
|                                  |                             | PCV20          | 2,262,347,702 | 1,691,168 | Dominated       |
| <b>Societal perspective</b>      |                             |                |               |           |                 |
| 2022                             | No indirect Effects         | PCV20          | 3,073,396,106 | 1,691,426 |                 |
|                                  |                             | PCV21          | 3,073,984,363 | 1,691,428 | 298,254         |
|                                  | Indirect Effects from PCV15 | PCV21          | 3,074,312,419 | 1,691,419 |                 |
|                                  |                             | PCV20          | 3,074,380,015 | 1,691,400 | Dominated       |
|                                  | Indirect Effects from PCV20 | PCV21          | 3,075,620,142 | 1,691,384 |                 |
|                                  |                             | PCV20          | 3,078,297,772 | 1,691,294 | Dominated       |
| 2015-2019                        | No indirect Effects         | PCV21          | 3,063,886,165 | 1,691,708 |                 |
|                                  |                             | PCV20          | 3,077,078,915 | 1,691,325 | Dominated       |
|                                  | Indirect Effects from PCV15 | PCV21          | 3,064,545,499 | 1,691,690 |                 |
|                                  |                             | PCV20          | 3,079,040,883 | 1,691,272 | Dominated       |
|                                  | Indirect Effects from PCV20 | PCV21          | 3,065,912,251 | 1,691,653 |                 |
|                                  |                             | PCV20          | 3,083,102,328 | 1,691,162 | Dominated       |

**Table S4.** Mean Costs, QALYs, and ICERs for pneumococcal vaccination of adults aged 50 years with chronic medical conditions (RR = 4), from health system and societal perspectives (per 100,000 population)

| Serotype distribution data year  | Indirect effects assumption | Rest of Canada |             |           |                    |
|----------------------------------|-----------------------------|----------------|-------------|-----------|--------------------|
|                                  |                             | Strategies     | Costs       | QALYs     | Sequential ICER    |
| <b>Health system perspective</b> |                             |                |             |           |                    |
| 2022                             | No indirect Effects         | PCV20          | 464,680,848 | 2,011,123 |                    |
|                                  |                             | PCV21          | 465,328,641 | 2,011,124 | 1,225,461          |
|                                  | Indirect Effects from PCV15 | PCV20          | 464,826,930 | 2,011,116 |                    |
|                                  |                             | PCV21          | 465,377,339 | 2,011,121 | 101,313            |
|                                  | Indirect Effects from PCV20 | PCV20          | 465,409,270 | 2,011,086 |                    |
|                                  |                             | PCV21          | 465,571,537 | 2,011,111 | 6,496              |
| 2015-2019                        | No indirect Effects         | PCV21          | 463,943,832 | 2,011,196 |                    |
|                                  |                             | PCV20          | 465,256,927 | 2,011,093 | Dominated by PCV21 |
|                                  | Indirect Effects from PCV15 | PCV21          | 464,041,335 | 2,011,191 |                    |
|                                  |                             | PCV20          | 465,548,697 | 2,011,078 | Dominated by PCV21 |
|                                  | Indirect Effects from PCV20 | PCV21          | 464,234,548 | 2,011,181 |                    |
|                                  |                             | PCV20          | 466,153,537 | 2,011,048 | Dominated by PCV21 |
| <b>Societal perspective</b>      |                             |                |             |           |                    |
| 2022                             | No indirect Effects         | PCV20          | 627,198,060 | 2,011,123 |                    |
|                                  |                             | PCV21          | 627,838,260 | 2,011,124 | 1,211,098          |
|                                  | Indirect Effects from PCV15 | PCV20          | 627,450,550 | 2,011,116 |                    |
|                                  |                             | PCV21          | 627,922,431 | 2,011,121 | 86,858             |
|                                  | Indirect Effects from PCV20 | PCV21          | 628,258,085 | 2,011,111 |                    |
|                                  |                             | PCV20          | 628,457,079 | 2,011,086 | Dominated by PCV21 |
| 2015-2019                        | No indirect Effects         | PCV21          | 625,416,503 | 2,011,196 |                    |
|                                  |                             | PCV20          | 628,203,078 | 2,011,093 | Dominated by PCV21 |
|                                  | Indirect Effects from PCV15 | PCV21          | 625,585,072 | 2,011,191 |                    |
|                                  |                             | PCV20          | 628,707,380 | 2,011,078 | Dominated by PCV21 |
|                                  | Indirect Effects from PCV20 | PCV21          | 625,934,531 | 2,011,181 |                    |
|                                  |                             | PCV20          | 629,752,807 | 2,011,048 | Dominated by PCV21 |

**Table S9.** Mean Costs, QALYs, and ICERs for pneumococcal vaccination of adults aged 50 years who are unhoused populations (RR = 50), from health system and societal perspectives (per 100,000 population)

| Serotype distribution data year | Indirect effects assumption | Rest of Canada |       |       |                 |
|---------------------------------|-----------------------------|----------------|-------|-------|-----------------|
|                                 |                             | Strategies     | Costs | QALYs | Sequential ICER |

| Health system perspective |                             |       |               |           |           |
|---------------------------|-----------------------------|-------|---------------|-----------|-----------|
| 2022                      | No indirect Effects         | PCV20 | 3,357,617,681 | 1,830,102 |           |
|                           |                             | PCV21 | 3,357,063,583 | 1,830,108 | 74,501    |
|                           | Indirect Effects from PCV15 | PCV21 | 3,358,625,104 | 1,830,081 |           |
|                           |                             | PCV20 | 3,359,299,737 | 1,830,021 | Dominated |
|                           | Indirect Effects from PCV20 | PCV21 | 3,360,857,668 | 1,829,974 |           |
|                           |                             | PCV20 | 3,365,945,589 | 1,829,704 | Dominated |
| 2015-2019                 | No indirect Effects         | PCV21 | 3,341,262,194 | 1,830,933 |           |
|                           |                             | PCV20 | 3,364,334,167 | 1,829,761 | Dominated |
|                           | Indirect Effects from PCV15 | PCV21 | 3,342,419,325 | 1,830,878 |           |
|                           |                             | PCV20 | 3,367,650,150 | 1,829,603 | Dominated |
|                           | Indirect Effects from PCV20 | PCV21 | 3,344,810,135 | 1,830,764 |           |
|                           |                             | PCV20 | 3,374,449,818 | 1,829,278 | Dominated |
| Societal perspective      |                             |       |               |           |           |
| 2022                      | No indirect Effects         | PCV20 | 4,574,652,469 | 1,830,102 |           |
|                           |                             | PCV21 | 4,575,010,814 | 1,830,108 | 59,872    |
|                           | Indirect Effects from PCV15 | PCV21 | 4,575,970,943 | 1,830,081 |           |
|                           |                             | PCV20 | 4,577,528,595 | 1,830,021 | Dominated |
|                           | Indirect Effects from PCV20 | PCV21 | 4,579,788,418 | 1,829,974 |           |
|                           |                             | PCV20 | 4,588,892,948 | 1,829,704 | Dominated |
| 2015-2019                 | No indirect Effects         | PCV21 | 4,546,225,581 | 1,830,933 |           |
|                           |                             | PCV20 | 4,586,441,928 | 1,829,761 | Dominated |
|                           | Indirect Effects from PCV15 | PCV21 | 4,548,203,759 | 1,830,878 |           |
|                           |                             | PCV20 | 4,592,111,670 | 1,829,603 | Dominated |
|                           | Indirect Effects from PCV20 | PCV21 | 4,552,291,082 | 1,830,764 |           |
|                           |                             | PCV20 | 4,651,061,119 | 1,827,856 | Dominated |

**Table S10.** Mean Costs, QALYs, and ICERs for pneumococcal vaccination of adults aged 33 years with immunocompromising conditions (RR = 34), from health system and societal perspectives (per 100,000 population)

| Serotype distribution data year | Indirect effects assumption | Rest of Canada |       |       |                 |
|---------------------------------|-----------------------------|----------------|-------|-------|-----------------|
|                                 |                             | Strategies     | Costs | QALYs | Sequential ICER |
| Health system perspective       |                             |                |       |       |                 |

|                             |                             |       |               |           |                    |
|-----------------------------|-----------------------------|-------|---------------|-----------|--------------------|
| 2022                        | No indirect Effects         | PCV20 | 1,952,943,411 | 2,349,621 |                    |
|                             |                             | PCV21 | 1,955,332,320 | 2,349,561 | Dominated by PCV20 |
|                             | Indirect Effects from PCV15 | PCV20 | 1,953,119,872 | 2,349,616 |                    |
|                             |                             | PCV21 | 1,955,390,815 | 2,349,560 | Dominated by PCV20 |
|                             | Indirect Effects from PCV20 | PCV20 | 1,954,039,509 | 2,349,588 |                    |
|                             |                             | PCV21 | 1,955,696,079 | 2,349,550 | Dominated by PCV20 |
| 2015-2019                   | No indirect Effects         | PCV21 | 1,953,582,595 | 2,349,616 |                    |
|                             |                             | PCV20 | 1,953,977,126 | 2,349,589 | Dominated by PCV21 |
|                             | Indirect Effects from PCV15 | PCV21 | 1,953,681,391 | 2,349,613 |                    |
|                             |                             | PCV20 | 1,954,272,626 | 2,349,580 | Dominated by PCV21 |
|                             | Indirect Effects from PCV20 | PCV21 | 1,954,008,945 | 2,349,603 |                    |
|                             |                             | PCV20 | 1,955,250,791 | 2,349,550 | Dominated by PCV21 |
| <b>Societal perspective</b> |                             |       |               |           |                    |
| 2022                        | No indirect Effects         | PCV20 | 2,810,495,976 | 2,349,621 |                    |
|                             |                             | PCV21 | 2,814,712,764 | 2,349,561 | Dominated by PCV20 |
|                             | Indirect Effects from PCV15 | PCV20 | 2,810,838,311 | 2,349,616 |                    |
|                             |                             | PCV21 | 2,814,826,251 | 2,349,560 | Dominated by PCV20 |
|                             | Indirect Effects from PCV20 | PCV20 | 2,812,622,461 | 2,349,588 |                    |
|                             |                             | PCV21 | 2,815,418,503 | 2,349,550 | Dominated by PCV20 |
| 2015-2019                   | No indirect Effects         | PCV21 | 2,811,288,383 | 2,349,616 |                    |
|                             |                             | PCV20 | 2,812,517,337 | 2,349,589 | Dominated by PCV21 |
|                             | Indirect Effects from PCV15 | PCV21 | 2,811,480,049 | 2,349,613 |                    |
|                             |                             | PCV20 | 2,813,090,629 | 2,349,580 | Dominated by PCV21 |
|                             | Indirect Effects from PCV20 | PCV21 | 2,812,115,513 | 2,349,603 |                    |
|                             |                             | PCV20 | 2,814,988,400 | 2,349,550 | Dominated by PCV21 |

**Table S11.** Mean Costs, QALYs, and ICERs for pneumococcal vaccination of adults aged 18-49 years with chronic medical conditions (RR = 4), from health system and societal perspectives (per 100,000 population)

| Serotype distribution data year  | Indirect effects assumption | Rest of Canada |             |           |                    |
|----------------------------------|-----------------------------|----------------|-------------|-----------|--------------------|
|                                  |                             | Strategies     | Costs       | QALYs     | Sequential ICER    |
| <b>Health system perspective</b> |                             |                |             |           |                    |
| 2022                             | No indirect Effects         | No vaccine     | 352,745,598 | 2,585,328 |                    |
|                                  |                             | PCV20          | 352,907,400 | 2,585,406 | 2,084              |
|                                  |                             | PCV21          | 353,960,132 | 2,585,391 | Dominated by PCV20 |

|                             |                             |            |             |           |                      |
|-----------------------------|-----------------------------|------------|-------------|-----------|----------------------|
|                             | Indirect Effects from PCV15 | No Vaccine | 352,745,598 | 2,585,328 |                      |
|                             |                             | PCV20      | 352,961,329 | 2,585,405 | 2,830                |
|                             |                             | PCV21      | 353,978,069 | 2,585,390 | Dominated by PCV20   |
|                             | Indirect Effects from PCV20 | No vaccine | 352,745,598 | 2,585,328 |                      |
|                             |                             | PCV20      | 353,242,727 | 2,585,397 | 7,217                |
|                             |                             | PCV21      | 354,071,715 | 2,585,388 | Dominated by PCV20   |
| 2015-2019                   | No indirect Effects         | No vaccine | 352,745,598 | 2,585,328 |                      |
|                             |                             | PCV20      | 353,218,349 | 2,585,398 | 6,820                |
|                             |                             | PCV21      | 353,436,472 | 2,585,405 | 31,219               |
|                             | Indirect Effects from PCV15 | No vaccine | 352,745,598 | 2,585,328 |                      |
|                             |                             | PCV20      | 353,308,840 | 2,585,395 | 8,412                |
|                             |                             | PCV21      | 353,466,671 | 2,585,404 | 18,442               |
|                             | Indirect Effects from PCV20 | No vaccine | 352,745,328 | 2,585,328 |                      |
|                             |                             | PCV21      | 353,566,843 | 2,585,401 | 11,264               |
|                             |                             | PCV20      | 353,608,817 | 2,585,388 | Dominated by PCV21   |
| <b>Societal perspective</b> |                             |            |             |           |                      |
| 2022                        | No indirect Effects         | No vaccine | 494,791,536 | 2,585,328 |                      |
|                             |                             | PCV20      | 500,772,943 | 2,585,406 | 77,056               |
|                             |                             | PCV21      | 502,283,380 | 2,585,391 | Dominated by PCV20   |
|                             | Indirect Effects from PCV15 | No vaccine | 494,791,536 | 2,585,328 |                      |
|                             |                             | PCV20      | 500,869,469 | 2,585,405 | 79,743               |
|                             |                             | PCV21      | 502,315,486 | 2,585,390 | Dominated by PCV20   |
|                             | Indirect Effects from PCV20 | No vaccine | 494,791,536 | 2,585,328 |                      |
|                             |                             | PCV20      | 501,373,148 | 2,585,397 | 95,544               |
|                             |                             | PCV21      | 502,483,107 | 2,585,388 | Dominated by PCV20   |
| 2015-2019                   | No indirect Effects         | No vaccine | 494,791,536 | 2,585,328 |                      |
|                             |                             | PCV21      | 501,341,472 | 2,585,405 | 85,840               |
|                             |                             | PCV20      | 501,332,149 | 2,585,398 | Extendedly dominated |
|                             | Indirect Effects from PCV15 | No vaccine | 494,791,536 | 2,585,328 |                      |
|                             |                             | PCV21      | 501,395,525 | 2,585,404 | 87,450               |
|                             |                             | PCV20      | 501,494,121 | 2,585,395 | Dominated by PCV21   |
|                             | Indirect Effects from PCV20 | No vaccine | 494,791,536 | 2,585,328 |                      |
|                             |                             | PCV21      | 501,574,824 | 2,585,401 | 93,040               |
|                             |                             | PCV20      | 502,031,063 | 2,585,388 | Dominated by PCV21   |



**Table S12.** Mean Costs, QALYs, and ICERs for pneumococcal vaccination of adults aged 18-49 years of unhoused population (RR = 50), from health system and societal perspectives (per 100,000 population)

| Serotype distribution data year  | Indirect effects assumption | Rest of Canada |               |           |                    |
|----------------------------------|-----------------------------|----------------|---------------|-----------|--------------------|
|                                  |                             | Strategies     | Costs         | QALYs     | Sequential ICER    |
| <b>Health system perspective</b> |                             |                |               |           |                    |
| 2022                             | No indirect Effects         | PCV20          | 2,841,894,983 | 2,459,641 |                    |
|                                  |                             | No vaccine     | 2,873,179,021 | 2,458,780 | Dominated by PCV21 |
|                                  |                             | PCV21          | 2,849,561,000 | 2,459,460 | Dominated by PCV20 |
|                                  | Indirect Effects from PCV15 | PCV20          | 2,842,566,191 | 2,459,625 |                    |
|                                  |                             | No vaccine     | 2,873,179,021 | 2,458,780 | Dominated by PCV21 |
|                                  |                             | PCV21          | 2,849,776,632 | 2,459,455 | Dominated by PCV20 |
|                                  | Indirect Effects from PCV20 | PCV20          | 2,846,023,666 | 2,459,541 |                    |
|                                  |                             | No vaccine     | 2,873,179,021 | 2,458,780 | Dominated by PCV21 |
|                                  |                             | PCV21          | 2,850,897,847 | 2,459,428 | Dominated by PCV20 |
| 2015-2019                        | No indirect Effects         | PCV21          | 2,842,942,021 | 2,459,625 |                    |
|                                  |                             | No vaccine     | 2,873,179,021 | 2,458,780 | Dominated by PCV20 |
|                                  |                             | PCV20          | 2,845,853,567 | 2,459,542 | Dominated by PCV21 |
|                                  | Indirect Effects from PCV15 | PCV21          | 2,843,317,086 | 2,459,616 |                    |
|                                  |                             | No vaccine     | 2,873,179,021 | 2,458,780 | Dominated by PCV20 |
|                                  |                             | PCV20          | 2,846,956,209 | 2,459,516 | Dominated by PCV21 |
|                                  | Indirect Effects from PCV20 | PCV21          | 2,844,554,773 | 2,459,586 |                    |
|                                  |                             | No vaccine     | 2,873,179,021 | 2,458,780 | Dominated by PCV20 |
|                                  |                             | PCV20          | 2,850,559,449 | 2,459,428 | Dominated by PCV21 |
| <b>Societal perspective</b>      |                             |                |               |           |                    |
| 2022                             | No indirect Effects         | PCV20          | 4,085,198,206 | 2,459,641 |                    |
|                                  |                             | No vaccine     | 4,134,168,120 | 2,458,780 | Dominated by PCV21 |
|                                  |                             | PCV21          | 4,098,316,594 | 2,459,460 | Dominated by PCV20 |
|                                  | Indirect Effects from PCV15 | PCV20          | 4,086,369,518 | 2,459,625 |                    |
|                                  |                             | No vaccine     | 4,134,168,120 | 2,458,780 | Dominated by PCV21 |
|                                  |                             | PCV21          | 4,098,692,974 | 2,459,455 | Dominated by PCV20 |
|                                  | Indirect Effects from PCV20 | PCV20          | 4,092,403,889 | 2,459,541 |                    |
|                                  |                             | No vaccine     | 4,134,168,120 | 2,458,780 | Dominated by PCV21 |
|                                  |                             | PCV21          | 4,100,650,063 | 2,459,428 | Dominated by PCV20 |
|                                  | No indirect Effects         | PCV21          | 4,086,724,549 | 2,459,625 |                    |

|           |                             |            |               |           |                    |
|-----------|-----------------------------|------------|---------------|-----------|--------------------|
| 2015-2019 |                             | No vaccine | 4,134,168,120 | 2,458,780 | Dominated by PCV20 |
|           |                             | PCV20      | 4,092,140,500 | 2,459,542 | Dominated by PCV21 |
|           | Indirect Effects from PCV15 | PCV21      | 4,087,379,064 | 2,459,616 |                    |
|           |                             | No vaccine | 4,134,168,120 | 2,458,780 | Dominated by PCV20 |
|           | Indirect Effects from PCV20 | PCV20      | 4,094,065,015 | 2,459,516 | Dominated by PCV21 |
|           |                             | PCV21      | 4,089,539,079 | 2,459,586 |                    |
|           |                             | No vaccine | 4,134,168,120 | 2,458,780 | Dominated by PCV20 |
|           |                             | PCV20      | 4,100,354,503 | 2,459,428 | Dominated by PCV21 |

## References

1. Public Health Agency of Canada. IPD in Canada, 2011-2020. 2022.
2. National Advisory Committee on Immunization. Public health level recommendations on the use of pneumococcal vaccines in adults, including the use of 15-valent and 20-valent conjugate vaccines. Ottawa (ON): Public Health Agency of Canada; 2023.
3. PHAC-NML. Annual counts of vaccine serotypes by age group, 2011-2023 (Unpublished data, Personal communication). Public Health Agency of Canada's National Microbiology Laboratory. 2024.
4. Canadian Institute for Health Information. Discharge Abstract Database 2015-2019 [Accessed March 3, 2022].
5. Shigayeva A, Chung H, Kwong JC, Demczuk WH, Martin I, Almorhi H, et al. Burden of Invasive Pneumococcal Disease Among Adults with Underlying Chronic Conditions Post Implementation of PCV13 Immunization Programs in South Central Ontario, Canada. 12th International Symposium on Pneumococci and Pneumococcal Diseases; Toronto, Canada 2022.
6. LeBlanc JJ, ElSherif M, Ye L, MacKinnon-Cameron D, Ambrose A, Hatchette TF, et al. Recalibrated estimates of non-bacteremic and bacteremic pneumococcal community acquired pneumonia in hospitalized Canadian adults from 2010 to 2017 with addition of an extended spectrum serotype-specific urine antigen detection assay. *Vaccine*. 2022;40(18):2635-46.
7. Wijayasri S, Hillier K, Lim GH, Harris TM, Wilson SE, Deeks SL. The shifting epidemiology and serotype distribution of invasive pneumococcal disease in Ontario, Canada, 2007-2017. *PLOS ONE*. 2019;14(12):e0226353.
8. Shigayeva A, Rudnick W, Green K, Chen DK, Demczuk W, Gold WL, et al. Invasive Pneumococcal Disease Among Immunocompromised Persons: Implications for Vaccination Programs. *Clin Infect Dis*. 2016;62(2):139-47.
9. Backhaus E, Berg S, Andersson R, Ockborn G, Malmström P, Dahl M, et al. Epidemiology of invasive pneumococcal infections: manifestations, incidence and case fatality rate correlated to age, gender and risk factors. *BMC Infectious Diseases*. 2016;16(1):367.
10. Jit M. The risk of sequelae due to pneumococcal meningitis in high-income countries: A systematic review and meta-analysis. *Journal of Infection*. 2010;61(2):114-24.
11. Leidner AJ. Summary of three economic models assessing pneumococcal vaccines in US adults. Presentation to the Advisory Committee on Immunization Practices. 2021.
12. van Werkhoven CH, Huijts SM, Bolkenbaas M, Grobbee DE, Bonten MJM. The Impact of Age on the Efficacy of 13-valent Pneumococcal Conjugate Vaccine in Elderly. *Clinical Infectious Diseases*. 2015;61(12):1835-8.
13. Patterson S, Webber C, Patton M, Drews W, Huijts SM, Bolkenbaas M, et al. A post hoc assessment of duration of protection in CAPiTA (Community Acquired Pneumonia immunization Trial in Adults). *Trials in Vaccinology*. 2016;5:92-6.
14. O'Reilly R, Lu H, Kwong JC, McGeer A, To T, Sander B. The epidemiology and healthcare costs of community-acquired pneumonia in Ontario, Canada: a population-based cohort study. *J Med Econ*. 2023;26(1):293-302.
15. Canadian Institute for Health Information (CIHI). Data Quality Documentation, Discharge Abstract Database — Current-Year Information, 2015–2016 [Internet]. Ottawa (ON): CIHI; 2016 [cited 2023 Mar 31]. Available from: [https://www.cihi.ca/sites/default/files/document/dad-data-quality\\_15-16\\_en.pdf](https://www.cihi.ca/sites/default/files/document/dad-data-quality_15-16_en.pdf).
16. Canadian Institute for Health Information (CIHI). Data Quality Documentation, Discharge Abstract Database - Current-Year Information, 2016–2017 [Internet]. Ottawa (ON): CIHI; 2017 [cited 2023 Mar 31]. Available from: [https://www.cihi.ca/sites/default/files/document/current-year-information\\_dad\\_2016-2017-en-web.pdf](https://www.cihi.ca/sites/default/files/document/current-year-information_dad_2016-2017-en-web.pdf).

17. Canadian Institute for Health Information (CIHI). Data Quality Documentation, Discharge Abstract Database - Current-Year Information, 2017–2018 [Internet]. Ottawa (ON): CIHI; 2018 [cited 2023 Mar 31]. Available from: <https://www.cihi.ca/sites/default/files/document/current-year-information-dad-2017-2018-en-web.pdf>.
18. Canadian Institute for Health Information (CIHI). Data Quality Documentation Discharge Abstract Database - Current-Year Information 2018–2019 [Internet]. Ottawa (ON): CIHI; 2019 [cited 2023 Mar 31]. Available from: <https://www.cihi.ca/sites/default/files/document/current-year-information-dad-2018-2019-en-web.pdf>.
19. Glauser W, Pendharkar S, Nolan M. Why do you have to pay for an ambulance? : healthydebate; 2015 [Available from: <https://healthydebate.ca/2015/07/topic/ambulance-fees/>].
20. Government of Northwest Territories. Visitors to the NWT Emergency Medical Travel [Internet]. 2018 [Available from: <https://www.hss.gov.nt.ca/sites/hss/files/resources/visitors-emergency-medical-travel.pdf>].
21. Government of Nunavut. Medical Travel - Medevac [Internet]. [Available from: <https://www.gov.nu.ca/health/information/medical-travel-medevac>].
22. Rendell M. City Brief: Should City Reduce Ambulance Fees? Edge North. 2016 March 22, 2016.
23. Tam DY, Banerji A, Paes BA, Hui C, Tarride J-E, Lanctôt KL. The cost effectiveness of palivizumab in term Inuit infants in the Eastern Canadian Arctic. *Journal of Medical Economics*. 2009;12(4):361-70.
24. Government of Yukon. Find out which medical travel costs our health plan covers [Available from: <https://yukon.ca/en/medical-treatment-travel>].
25. Pong RW, Pitblado JR. Geographic distribution of physicians in Canada: beyond how many and where. Ottawa, Ontario: Canadian Institute for Health Information,; 2005. Contract No.: ISBN 1-55392-736-2 (PDF).
26. Canada Revenue Agency. Reasonable per-kilometre allowance 2022 [Available from: <https://www.canada.ca/en/revenue-agency/services/tax/businesses/topics/payroll/benefits-allowances/automobile/automobile-motor-vehicle-allowances/reasonable-kilometre-allowance.html>].
27. Colbert Y. 'My jaw dropped,' says Ontario woman of \$12K air ambulance bill in Nova Scotia. *CBC News*. 2020 November 27, 2020.
28. Hollander MJ, Liu G, Chappell NL. Who cares and how much? The imputed economic contribution to the Canadian healthcare system of middle-aged and older unpaid caregivers providing care to the elderly. *Healthc Q*. 2009;12(2):42-9.
29. Wyrwich KW, Yu H, Sato R, Powers JH. Observational longitudinal study of symptom burden and time for recovery from community-acquired pneumonia reported by older adults surveyed nationwide using the CAP Burden of Illness Questionnaire. *Patient Relat Outcome Meas*. 2015;6:215-23.
30. Ganapathy V, Graham GD, DiBonaventura MD, Gillard PJ, Goren A, Zorowitz RD. Caregiver burden, productivity loss, and indirect costs associated with caring for patients with poststroke spasticity. *Clin Interv Aging*. 2015;10:1793-802.
31. Tyrrell G, Lee C, Eurich D. Is there a need for pneumococcal vaccination programs for the homeless to prevent invasive pneumococcal disease? *Expert Review of Vaccines*. 2021;20(9):1113-21.
32. Plevneshi A, Svoboda T, Armstrong I, Tyrrell GJ, Miranda A, Green K, et al. Population-based surveillance for invasive pneumococcal disease in homeless adults in Toronto. *PLoS One*. 2009;4(9):e7255.
33. Steinberg J, Bressler SS, Orell L, Thompson GC, Kretz A, Reasonover AL, et al. Invasive Pneumococcal Disease and Potential Impact of Pneumococcal Conjugate Vaccines Among Adults, Including Persons Experiencing Homelessness—Alaska, 2011–2020. *Clinical Infectious Diseases*. 2023;78(1):172-8.

34. Shariatzadeh MR, Huang JQ, Tyrrell GJ, Johnson MM, Marrie TJ. Bacteremic pneumococcal pneumonia: a prospective study in Edmonton and neighboring municipalities. *Medicine (Baltimore)*. 2005;84(3):147-61.
35. Lansbury L, Lim B, McKeever TM, Lawrence H, Lim WS. Non-invasive pneumococcal pneumonia due to vaccine serotypes: A systematic review and meta-analysis. *eClinicalMedicine*. 2022;44.
36. Government of Canada. Adult National Immunization Coverage Survey (aNICS): 2023 results. Ottawa, ON: Government of Canada; 2024.
37. Farrar JL, Childs L, Ouattara M, Akhter F, Britton A, Pilishvili T, Kobayashi M. Systematic Review and Meta-Analysis of the Efficacy and Effectiveness of Pneumococcal Vaccines in Adults. *Pathogens*. 2023;12(5).
38. Lewis N, Hsiao A, Hansen J, Yee A, Chao C, Suaya JA, et al. 2711. Effectiveness of 13-Valent Pneumococcal Conjugate Vaccine Against Invasive Pneumococcal Disease in Older Adults. *Open Forum Infectious Diseases*. 2019;6(Supplement\_2):S953-S4.
39. Stoecker C. Economic analysis and public health impact of PCV21 in adults [slides presented at Advisory Committee on Immunization Practices (ACIP) meeting June 27, 2024][Internet]. Atlanta (GA): Center for Disease Control and Prevention; 2024 Jun 27 [cited TBD]. Available from: TBD.
40. Djennad A, Ramsay ME, Pebody R, Fry NK, Sheppard C, Ladhani SN, Andrews NJ. Effectiveness of 23-Valent Polysaccharide Pneumococcal Vaccine and Changes in Invasive Pneumococcal Disease Incidence from 2000 to 2017 in Those Aged 65 and Over in England and Wales. *eClinicalMedicine*. 2018;6:42-50.
41. Bonten MJM, Huijts SM, Bolkenbaas M, Webber C, Patterson S, Gault S, et al. Polysaccharide Conjugate Vaccine against Pneumococcal Pneumonia in Adults. *New England Journal of Medicine*. 2015;372(12):1114-25.
42. Stoecker C. Economic assessment of routine PCV20 for children [slides presented at Advisory Committee on Immunization Practices (ACIP) meeting June 22, 2023][Internet]. Atlanta (GA): Center for Disease Control and Prevention; 2023 Jun 22 [cited 2023 Jun 24]. Available from: <https://www.cdc.gov/vaccines/acip/meetings/downloads/slides-2023-06-21-23/02-Pneumococcal-Stoecker-508.pdf>.
43. Suaya JA, Jiang Q, Scott DA, Gruber WC, Webber C, Schmoele-Thoma B, et al. Post hoc analysis of the efficacy of the 13-valent pneumococcal conjugate vaccine against vaccine-type community-acquired pneumonia in at-risk older adults. *Vaccine*. 2018;36(11):1477-83.
44. O'Reilly R, Kwong JC, McGeer A, To T, Sander B. The Cost-Effectiveness of a Pneumococcal Conjugate Vaccine (PCV13) Program for Older Adults (65+) in Ontario, Canada: Update on the use of pneumococcal vaccine in immunocompetent adults 65 years of age and older – A Public Health Perspective in the Context of Infant Immunization and Changing Serotype Distributions. Society for Medical Decision Making 39th Annual North American Meeting (Poster Session 1) 2017 .
45. Pfizer Canada. Personal communication: PCV20 Canadian list price update. 2024.
46. Merck Canada Inc. Personal communication: Disclosure of V116 (PCV-21; PNEU-C-21) List Price for Economic Evaluation. 2024.
47. Christensen H, Trotter CL, Hickman M, Edmunds WJ. Re-evaluating cost effectiveness of universal meningitis vaccination (Bexsero) in England: modelling study. *BMJ*. 2014;349:g5725.
48. Ontario Ministry of Health. Ontario Drug Benefit Formulary/Comparative Drug Index [Internet]. 2022 [Available from: [https://www.health.gov.on.ca/en/pro/programs/drugs/formulary43/edition\\_43.pdf](https://www.health.gov.on.ca/en/pro/programs/drugs/formulary43/edition_43.pdf)].
49. Statistics Canada. Table 11-10-0239-01. Income of individuals by age group, sex and income source, Canada, provinces and selected census metropolitan areas [Internet]. Ottawa (ON): Statistics Canada; 2024 May 24 [cited 2024 May 24]. Available from: <https://doi.org/10.25318/1110023901-eng>.

50. Pasquale CB, Vietri J, Choate R, McDaniel A, Sato R, Ford KD, et al. Patient-reported consequences of community-acquired pneumonia in patients with chronic obstructive pulmonary disease. *Chronic Obstr Pulm Dis*. 2019;6(2):132-44.
51. Bizier C, Contreras R, Walpole A. Hearing disabilities among Canadians aged 15 years and older, 2012 [Internet]. Statistics Canada,; 2016 [
52. Jiang Y, Gauthier A, Annemans L, van der Linden M, Nicolas-Spony L, Bresse X. Cost-effectiveness of vaccinating adults with the 23-valent pneumococcal polysaccharide vaccine (PPV23) in Germany. *Expert Review of Pharmacoeconomics & Outcomes Research*. 2012;12(5):645-60.
53. Yan J, Xie S, Johnson JA, Pullenayegum E, Ohinmaa A, Bryan S, Xie F. Canada population norms for the EQ-5D-5L. *Eur J Health Econ*. 2023.
54. Mangen M-JJ, Huijts SM, Bonten MJM, de Wit GA. The impact of community-acquired pneumonia on the health-related quality-of-life in elderly. *BMC Infectious Diseases*. 2017;17(1):208.
55. Oppong R, Jit M, Smith RD, Butler CC, Melbye H, Mölsted S, Coast J. Cost-effectiveness of point-of-care C-reactive protein testing to inform antibiotic prescribing decisions. *Br J Gen Pract*. 2013;63(612):e465-e71.
56. Oppong R, Kaambwa B, Nuttall J, Hood K, Smith RD, Coast J. The impact of using different tariffs to value EQ-5D health state descriptions: an example from a study of acute cough/lower respiratory tract infections in seven countries. *The European Journal of Health Economics*. 2013;14(2):197-209.
57. Galante J, Augustovski F, Colantonio L, Bardach A, Caporale J, Marti SG, Kind P. Estimation and Comparison of EQ-5D Health States' Utility Weights for Pneumococcal and Human Papillomavirus Diseases in Argentina, Chile, and the United Kingdom. *Value in Health*. 2011;14(5, Supplement):S60-S4.
